# Supplementary material
Source: publisher figshare collection journal article supplement (https://frontiersin.figshare.com/ndownloader/files/34851540)
Supplement: Supplementary file [file 34851540]

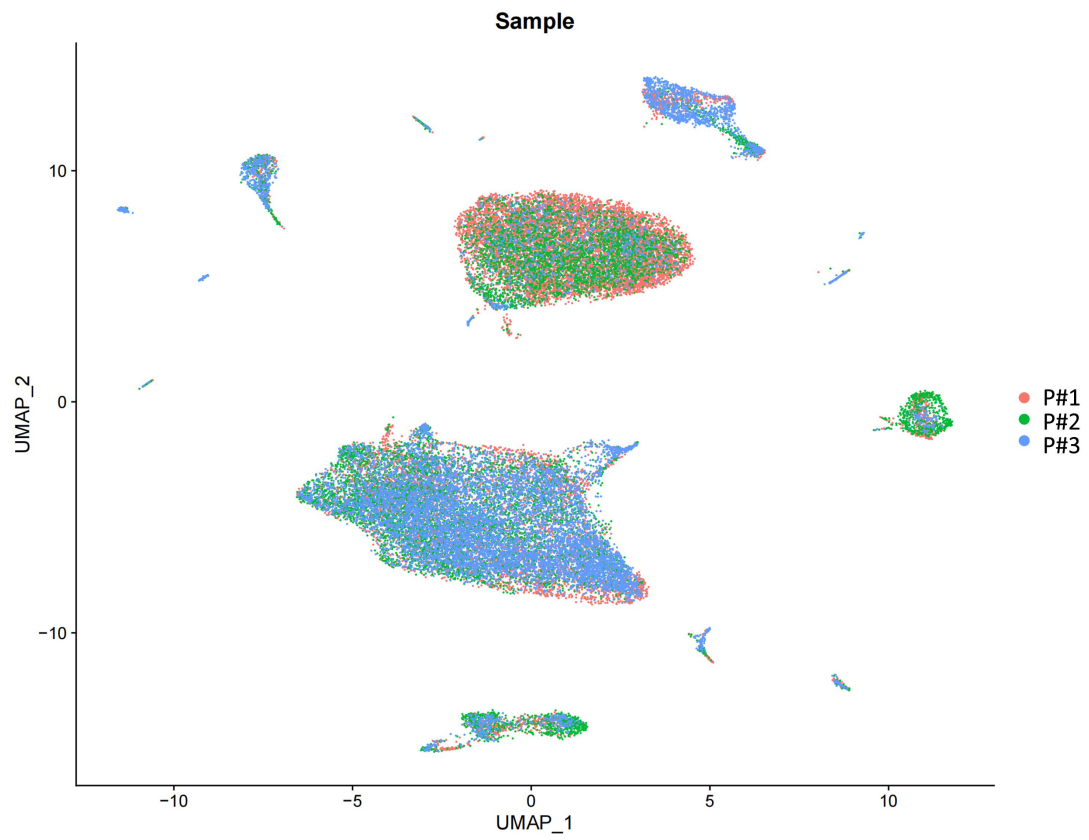

**Figure S1.** UMAP plot of three samples were colored as indicated in the legend.

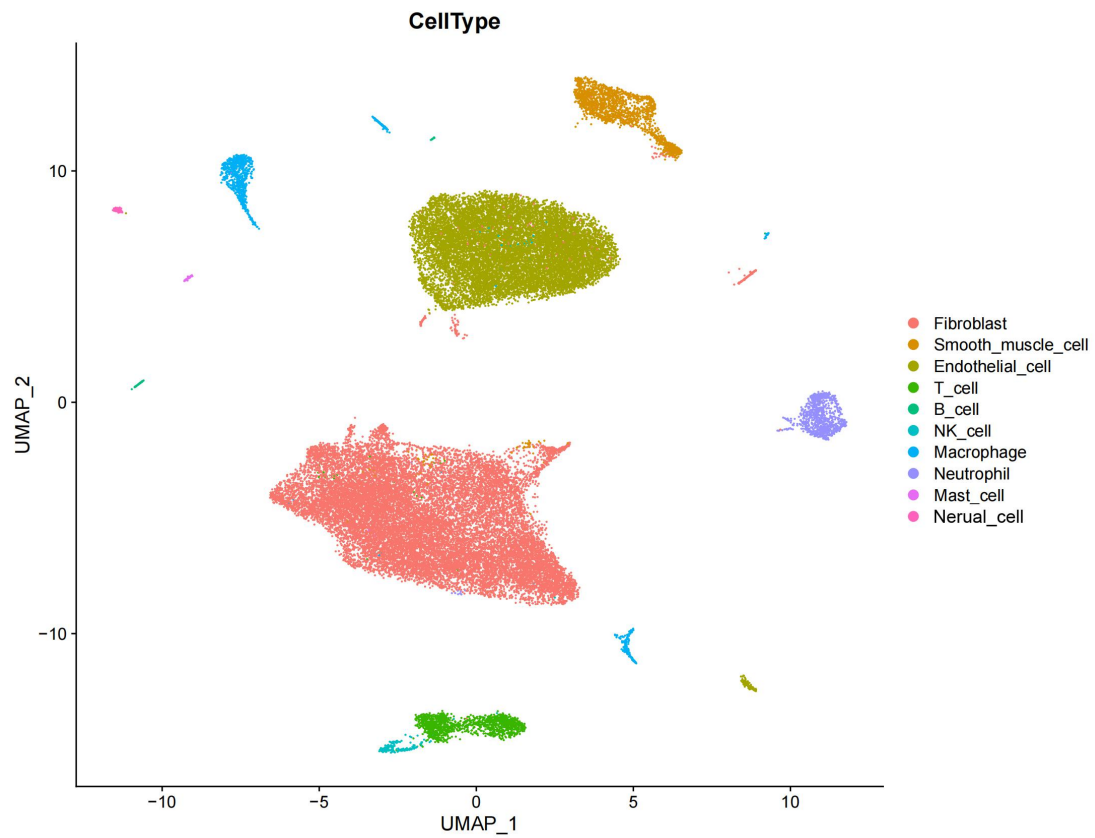

**Figure S2.** UMAP plot of cells from the three samples profiled in this study, with each cell colored coded to indicate the associated cell types.

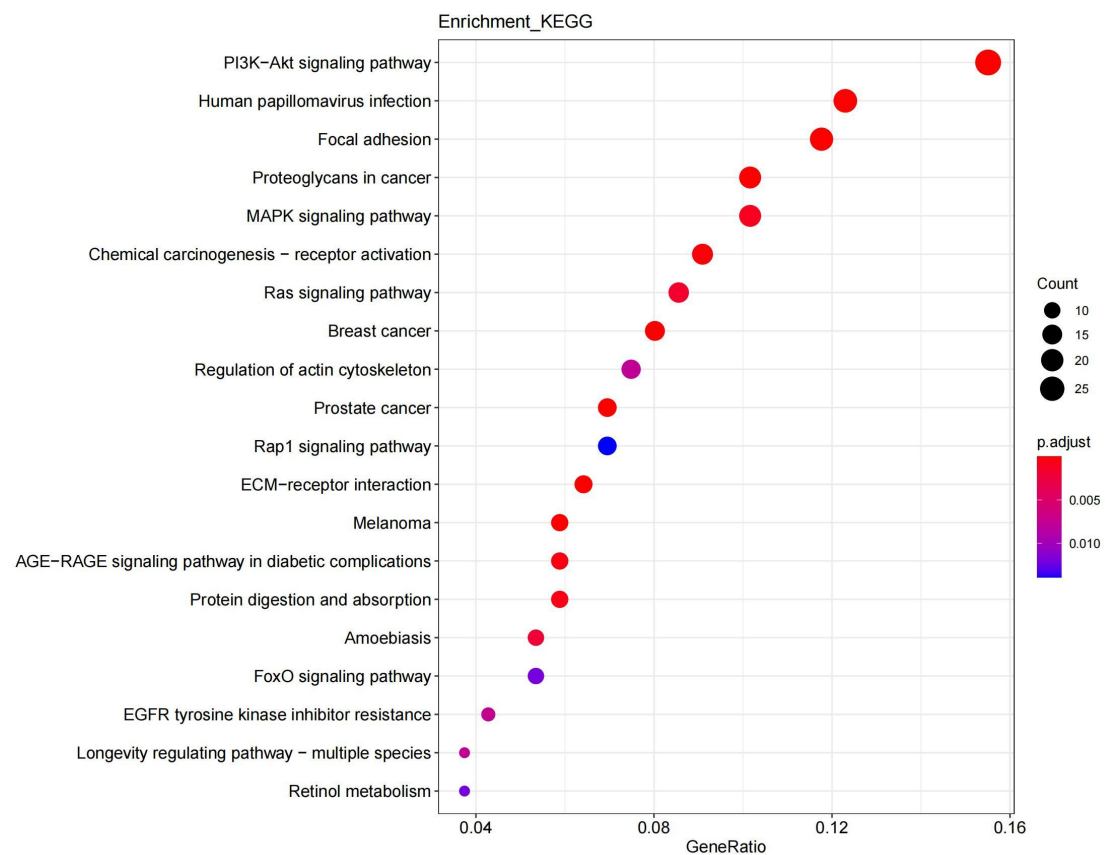

**Figure S3.** KEGG analysis of fibroblasts, type I (Fib I)

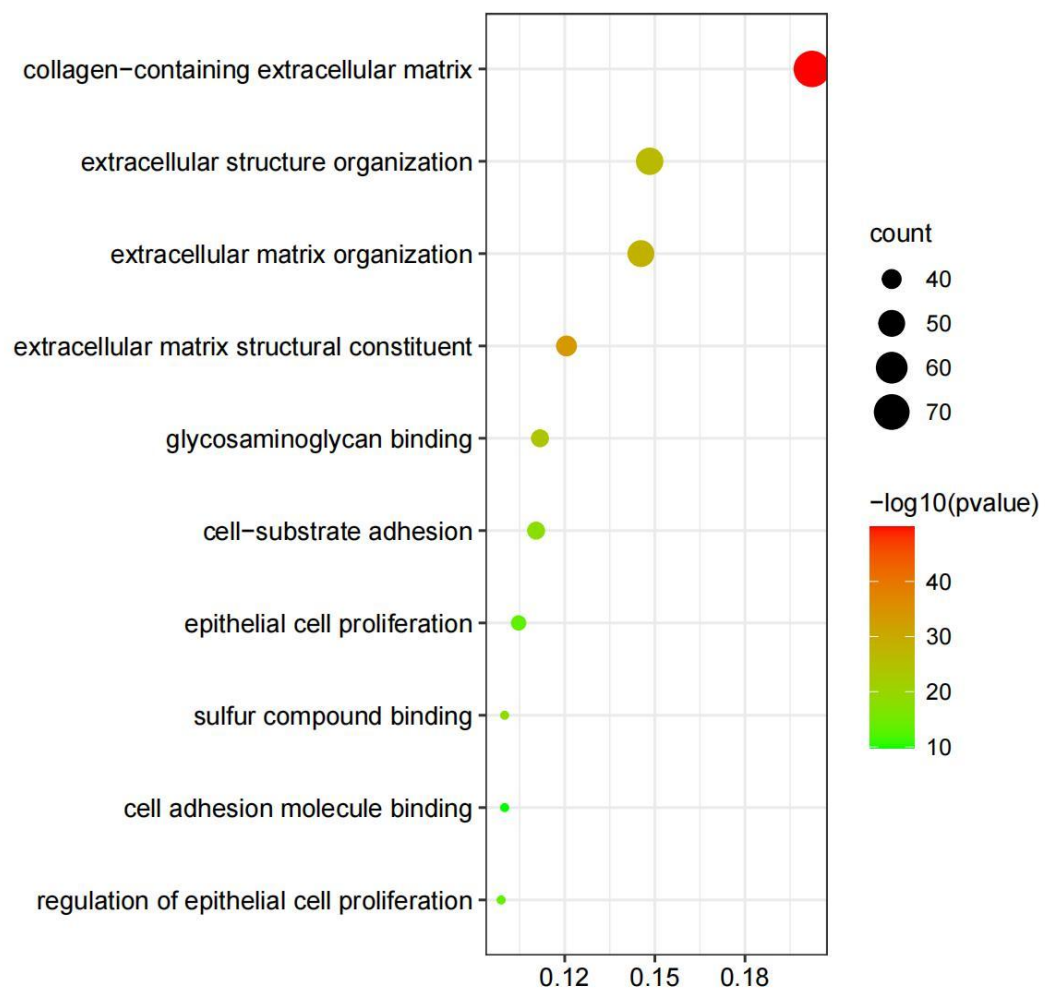

**Figure S4.** GO analysis of fibroblasts, type I (Fib I)

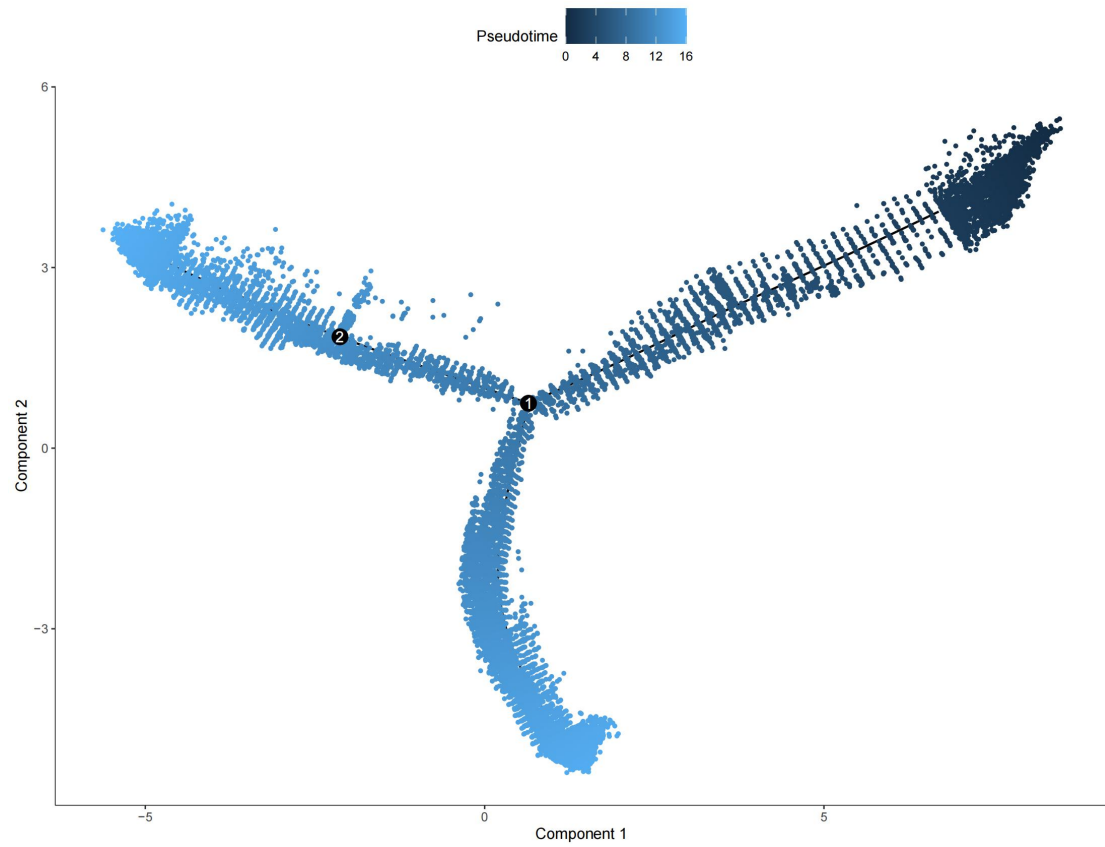

**Figure S5.** Cells are colored based on pseudotime inferred from cell trajectory, with pseudotime beginning in the branch on the right and advancing as cells approach two left branches.

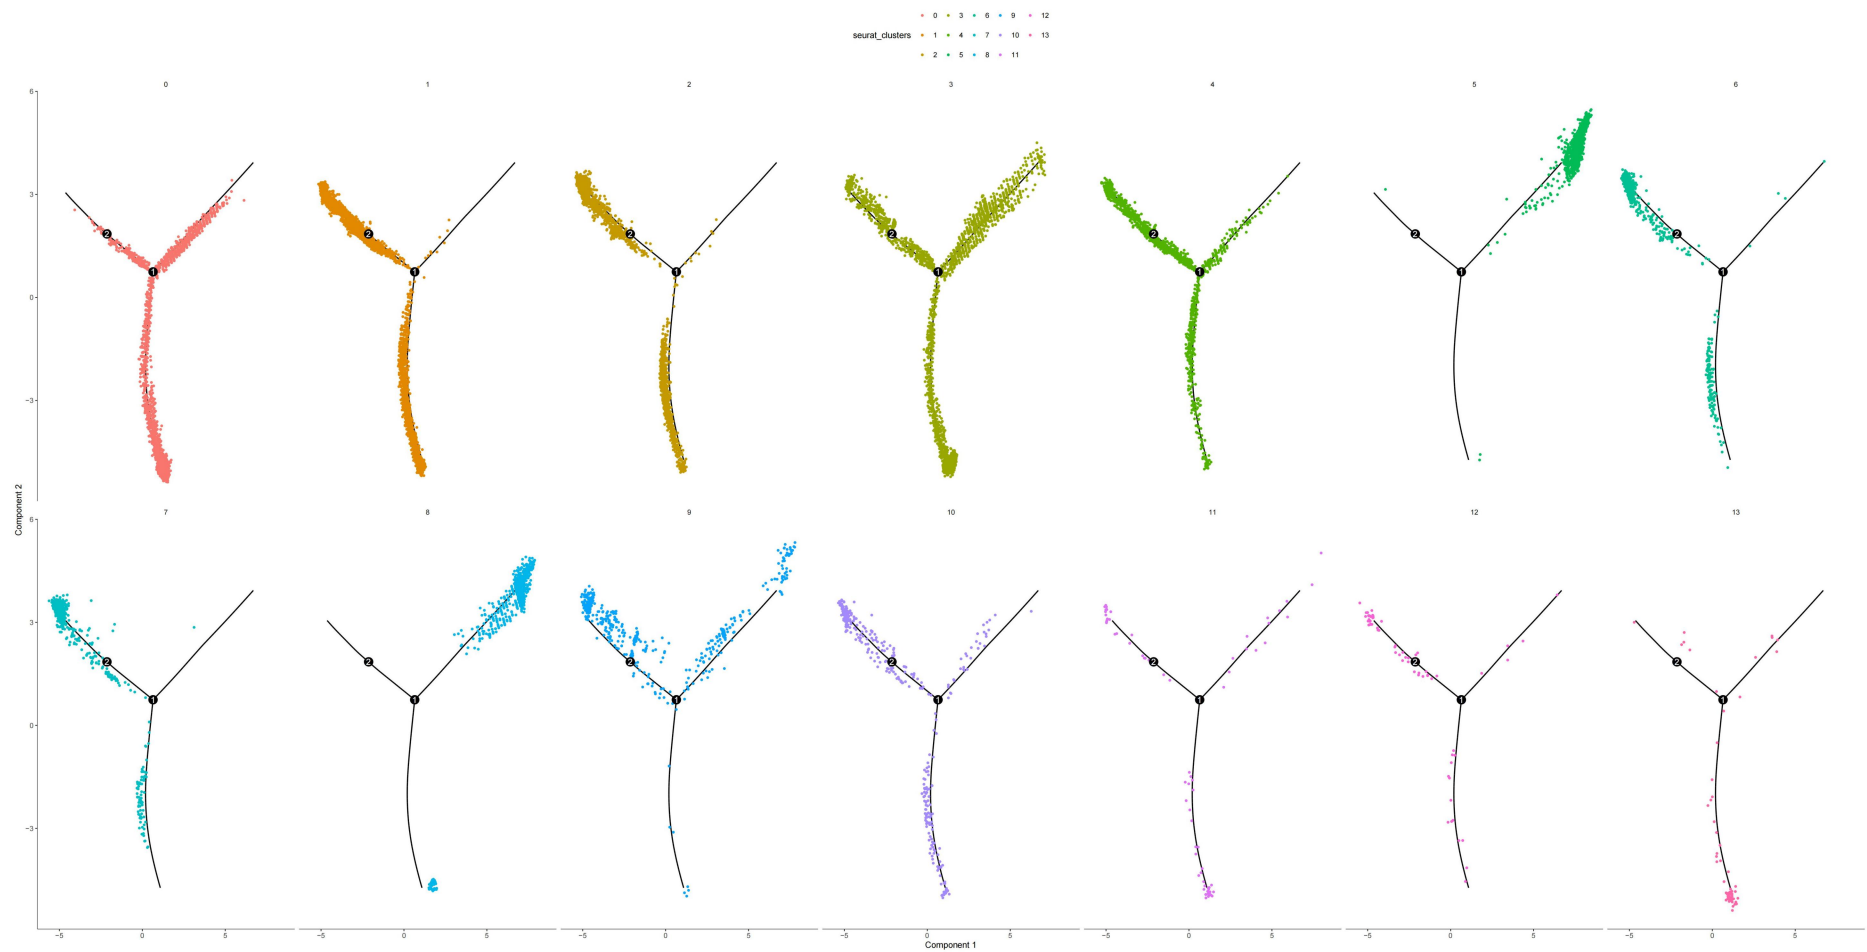

**Figure S6.** Cells from distinct subclusters shows their relative abundance across the pseudotime trajectory

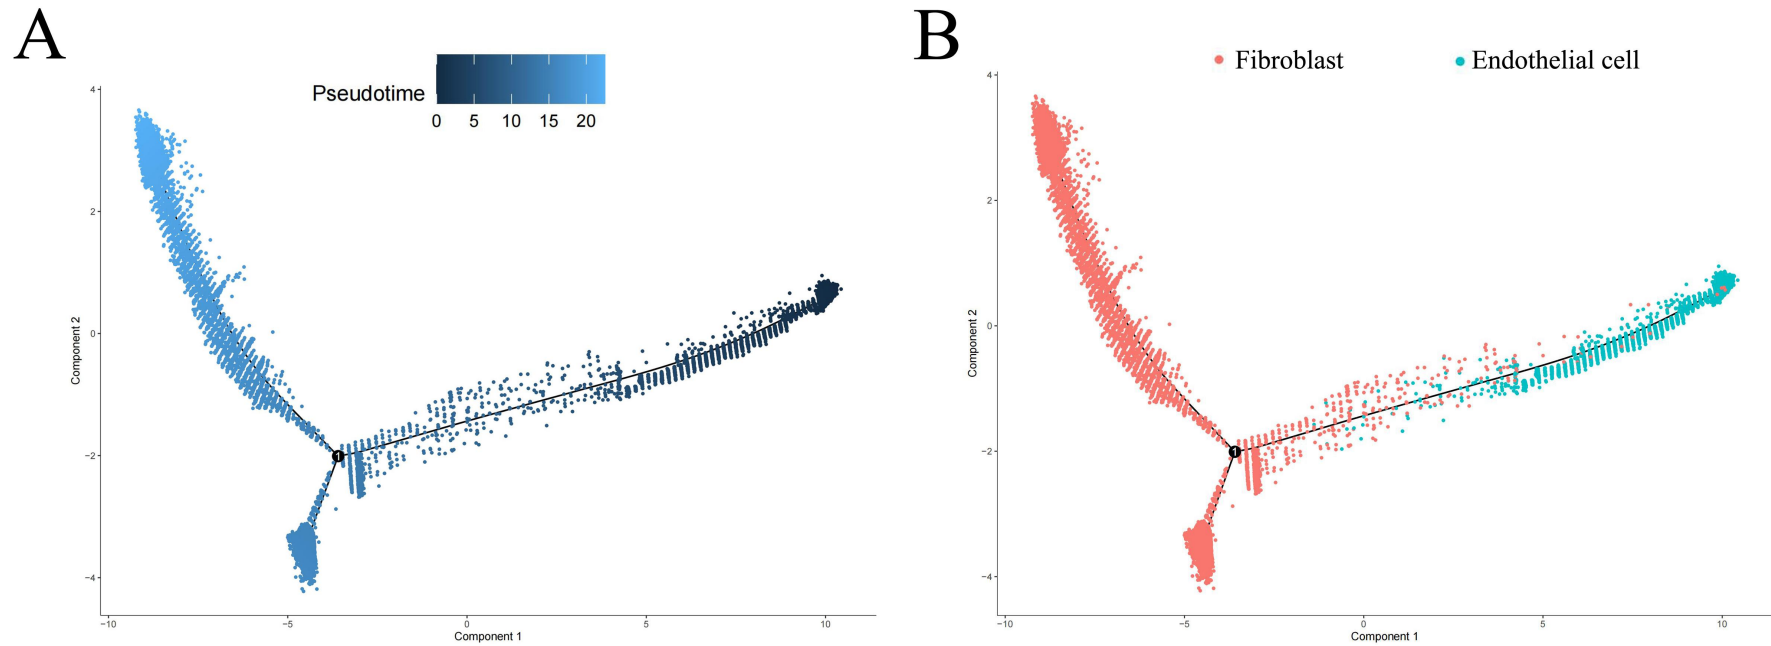

**Figure S7 Predicated differentiation trajectories from endothelial cells into fibroblasts**

The discriminative dimensionality reduction with trees algorithm was performed between endothelial cells and fibroblasts. (A) Cells are colored based on pseudotime inferred from cell trajectory, which corresponded to Figure S5. (B) The cell types were colored as Figure 4A.
